# Supplementary material for: Empirical study on visual attention characteristics of basketball players of different levels during free-throw shooting
Source: PeerJ. 2023 Dec 11;11:e16607. doi: 10.7717/peerj.16607 (PMC10720415; doi:10.7717/peerj.16607)
Supplement: Supplemental Information 2 [file peerj-11-16607-s002.xlsx]

## Sheet: fixation duration
group	Front	Top	Bottom	Top left	Bottom left	Top right	Bottom right
expert	680	720	290	320	200	0	0
expert	720	500	300	400	230	0	0
expert	560	600	320	320	280	0	0
expert	600	490	300	400	230	0	0
expert	720	550	320	340	220	0	0
expert	620	500	350	300	260	0	0
expert	560	350	400	370	0	300	0
expert	500	490	280	345	240	0	0
expert	700	500	350	330	200	0	0
expert	720	740	380	300	240	0	0
expert	400	750	330	360	260	0	0
expert	750	700	0	330	350	0	0
expert	700	400	380	320	230	0	0
expert	630	600	350	360	310	0	0
expert	720	700	370	330	230	0	0
expert	520	600	300	300	260	0	0
expert	700	590	400	300	0	0	0
expert	550	580	320	310	245	0	0
expert	600	400	360	380	300	0	0
expert	620	500	280	320	220	0	200
general	530	560	280	300	300	200	0
general	620	600	330	360	260	230	0
general	610	680	300	390	280	200	0
general	720	450	400	330	260	200	0
general	600	460	320	300	210	200	210
general	680	520	350	380	220	0	230
general	650	500	410	330	200	240	200
general	560	580	360	400	260	200	200
general	500	520	400	200	300	200	300
general	600	580	350	320	200	240	0
general	710	580	400	430	300	0	200
general	500	530	390	410	0	200	290
general	540	540	410	400	200	200	200
general	530	500	400	416	200	0	200
general	570	610	350	380	260	0	200
general	580	520	350	390	200	230	0
general	610	532	380	430	240	0	200
general	580	560	390	380	260	0	200
general	530	540	380	360	230	200	200
general	600	490	400	380	220	230	0
novice	420	300	400	300	300	230	200
novice	420	400	320	320	260	210	0
novice	500	300	450	390	410	300	200
novice	400	360	400	330	260	210	200
novice	500	400	320	300	220	200	300
novice	400	400	360	380	220	200	240
novice	500	360	380	330	200	240	0
novice	440	300	230	420	260	200	310
novice	600	400	300	300	230	200	200
novice	510	360	350	510	200	250	230
novice	480	300	480	300	300	210	200
novice	420	350	420	320	210	0	230
novice	460	400	360	310	200	230	200
novice	500	450	370	300	240	200	230
novice	580	300	380	400	280	200	200
novice	480	420	350	390	230	200	260
novice	500	300	410	420	260	240	200
novice	400	420	420	360	280	200	200
novice	500	420	360	380	240	200	200
novice	510	360	300	450	200	250	200

## Sheet: number of fixations
group	Front	Top	Bottom	Top left	Bottom left	Top right	Bottom right
expert	1	2	1	1	1	0	0
expert	2	1	1	1	1	0	0
expert	1	1	1	1	1	0	0
expert	1	1	1	2	1	0	0
expert	2	1	1	1	1	0	0
expert	1	2	1	1	1	0	0
expert	1	1	1	1	0	1	0
expert	1	1	1	1	1	0	0
expert	1	1	1	1	1	0	0
expert	2	1	1	1	1	0	0
expert	1	1	1	1	1	0	0
expert	2	2	0	1	1	0	0
expert	1	1	1	1	1	0	0
expert	1	1	1	1	1	0	0
expert	2	1	1	1	1	0	0
expert	1	1	1	1	1	0	0
expert	1	2	1	1	0	0	0
expert	1	1	1	1	1	0	0
expert	1	1	1	1	1	0	0
expert	2	1	1	1	1	0	1
general	1	1	1	1	1	1	0
general	2	2	1	1	1	1	0
general	2	2	1	1	1	1	0
general	2	1	2	1	1	1	0
general	1	1	1	1	1	1	1
general	2	2	1	1	1	0	1
general	1	2	2	1	1	1	1
general	1	1	1	2	1	1	1
general	2	1	2	1	1	1	1
general	2	1	1	1	1	1	0
general	2	1	2	2	1	1	1
general	1	1	1	2	0	0	1
general	2	1	1	2	1	1	1
general	1	1	1	1	1	0	1
general	1	2	1	1	1	0	1
general	1	1	1	1	1	1	0
general	2	1	1	1	1	0	1
general	1	2	1	1	1	0	1
general	1	1	1	1	1	1	1
general	2	2	2	1	1	1	0
novice	2	1	2	1	1	1	1
novice	2	1	1	1	1	1	0
novice	2	1	2	1	1	1	1
novice	1	2	2	1	1	1	1
novice	2	2	1	1	1	1	1
novice	1	2	1	1	1	1	1
novice	2	1	1	1	1	1	0
novice	2	1	1	2	1	1	1
novice	3	2	1	1	1	1	1
novice	1	1	1	2	1	1	1
novice	2	1	2	1	1	1	1
novice	2	1	2	1	1	0	1
novice	2	2	1	1	1	1	1
novice	2	2	1	1	1	1	1
novice	2	1	1	2	1	1	1
novice	1	2	1	1	1	1	1
novice	2	1	2	2	1	1	1
novice	1	2	2	1	1	1	1
novice	2	2	1	1	1	1	1
novice	2	1	1	2	1	1	1

## Sheet: pupil dilation
group	pupil dilation
expert	1478
expert	1520
expert	1411
expert	1396
expert	1433
expert	1354
expert	1297
expert	1463
expert	1577
expert	1299
expert	1285
expert	1366
expert	1402
expert	1287
expert	1304
expert	1501
expert	1256
expert	1306
expert	1412
expert	1352
general	1301
general	1374
general	1325
general	1355
general	1401
general	1326
general	1368
general	1360
general	1324
general	1355
general	1386
general	1359
general	1206
general	1284
general	1379
general	1209
general	1394
general	1397
general	1268
general	1301
novice	1304
novice	1299
novice	1285
novice	1269
novice	1321
novice	1287
novice	1365
novice	1269
novice	1314
novice	1269
novice	1255
novice	1349
novice	1269
novice	1369
novice	1239
novice	1298
novice	1354
novice	1254
novice	1295
novice	1336

## Sheet: saccadic amplitude
group	saccadic amplitude
expert	3.59
expert	3.86
expert	3.79
expert	3.17
expert	2.9
expert	3.45
expert	3.14
expert	3.64
expert	3.35
expert	3.41
expert	3.75
expert	3.55
expert	3.86
expert	3.29
expert	3.87
expert	3.06
expert	3.85
expert	3.66
expert	3.87
expert	3.45
general	3.26
general	3.63
general	3.54
general	3.44
general	3.64
general	3.52
general	3.67
general	3.45
general	3.38
general	3.65
general	3.29
general	3.34
general	3.65
general	3.51
general	3.72
general	3.56
general	3.58
general	3.56
general	3.66
general	3.78
novice	3.92
novice	4.01
novice	3.87
novice	3.96
novice	3.59
novice	3.64
novice	3.58
novice	3.79
novice	3.55
novice	4.03
novice	3.6
novice	3.68
novice	3.48
novice	3.58
novice	3.81
novice	3.79
novice	3.28
novice	3.69
novice	3.64
novice	3.89
